# Supplementary material
Source: ML conference proceedings conference paper supplement (https://openreview.net/forum?id=f7cWROZYSU)
Supplement: supplementary_material [file attachment]

# DETECTING WORST-CASE CORRUPTIONS VIA LOSS LANDSCAPE CURVATURE IN DEEP REINFORCEMENT LEARNING

**Anonymous authors**

Paper under double-blind review

## 1 TRUE POSITIVE RATES (TPRS)

In this section we provide true positive rates (TPRs) for SO-DATA, FO-DATA and Roth et al. (2019) for various additional FPR values. Table 1 shows the TPR values when false positive rate (FPR) is equal to 0.001 with FGSM, MI-FGSM and Nesterov Momentum adversarial examples for Riverraid, RoadRunner, Alien, Seaquest, Boxing, Pong, and Robotank. Table 2 shows the TPR values when false positive rate (FPR) is equal to 0.025 with Carlini & Wagner (2017), Elastic Net and DeepFool adversarial examples for Riverraid, RoadRunner, Alien, Seaquest, Boxing, Pong, and Robotank.

Table 1: True Positive Rates (TPR) for FGSM, MI-FGSM, and Nesterov Momentum when False Positive Rate (FPR) is equal to 0.001. The proposed methods SO-DATA and FO-DATA are evaluated in Riverraid, RoadRunner, Alien, Seaquest, Boxing, Pong, and Robotank.

| Detection Method-Attack Method       | RiverRaid | RoadRunner | Alien | Seaquest | Boxing | Pong  | Robotank |
|--------------------------------------|-----------|------------|-------|----------|--------|-------|----------|
| SO-DATA FGSM                         | 0.988     | 1.0        | 1.0   | 0.989    | 0.989  | 1.0   | 0.999    |
| FO-DATA FGSM                         | 0.953     | 0.75       | 0.765 | 0.509    | 0.783  | 0.581 | 0.206    |
| Roth et al. (2019) FGSM              | 0.160     | 0.166      | 0.635 | 0.054    | 0.032  | 0.174 | 0.599    |
| SO-DATA MI-FGSM                      | 0.996     | 1.0        | 1.0   | 0.954    | 0.882  | 1.0   | 0.983    |
| FO-DATA MI-FGSM                      | 0.793     | 0.778      | 0.981 | 0.776    | 0.805  | 0.577 | 0.173    |
| Roth et al. (2019) MI-FGSM           | 0.391     | 0.291      | 0.786 | 0.156    | 0.170  | 0.419 | 0.505    |
| SO-DATA Nesterov Momentum            | 0.975     | 0.982      | 0.994 | 0.923    | 0.865  | 1.0   | 0.947    |
| FO-DATA Nesterov Momentum            | 0.881     | 0.450      | 0.990 | 0.759    | 0.723  | 0.628 | 0.304    |
| Roth et al. (2019) Nesterov Momentum | 0.430     | 0.314      | 0.817 | 0.276    | 0.228  | 0.461 | 0.545    |

Table 2: True Positive Rates (TPR) for Carlini & Wagner (2017), Elastic-Net and DeepFool when False Positive Rate (FPR) is equal to 0.025. The proposed methods SO-DATA and FO-DATA are evaluated in Riverraid, RoadRunner, Alien, Seaquest, Boxing, Pong, and Robotank.

| Detection Method-Attack Method    | RiverRaid | RoadRunner | Alien | Seaquest | Boxing | Pong  | Robotank |
|-----------------------------------|-----------|------------|-------|----------|--------|-------|----------|
| SO-DATA Carlini&Wagner            | 0.940     | 0.991      | 0.960 | 0.778    | 0.891  | 0.865 | 0.733    |
| FO-DATA Carlini&Wagner            | 0.759     | 0.598      | 0.749 | 0.595    | 0.883  | 0.583 | 0.191    |
| Roth et al. (2019) Carlini&Wagner | 0.032     | 0.166      | 0.040 | 0.026    | 0.202  | 0.038 | 0.112    |
| SO-DATA Elastic Net               | 0.839     | 0.951      | 0.912 | 0.753    | 0.829  | 0.753 | 0.832    |
| FO-DATA Elastic Net               | 0.765     | 0.516      | 0.676 | 0.577    | 0.818  | 0.433 | 0.317    |
| Roth et al. (2019) Elastic Net    | 0.118     | 0.280      | 0.158 | 0.046    | 0.316  | 0.102 | 0.106    |
| SO-DATA DeepFool                  | 0.955     | 0.997      | 0.994 | 0.908    | 0.964  | 0.903 | 0.910    |
| FO-DATA DeepFool                  | 0.922     | 0.872      | 0.961 | 0.826    | 0.958  | 0.851 | 0.416    |
| Roth et al. (2019) DeepFool       | 0.468     | 0.555      | 0.266 | 0.376    | 0.567  | 0.369 | 0.703    |

## REFERENCES

Nicholas Carlini and David Wagner. Towards evaluating the robustness of neural networks. *In 2017 IEEE Symposium on Security and Privacy (SP)*, pp. 39–57, 2017.

Kevin Roth, Yannic Kilcher, and Thomas Hofmann. The odds are odd: A statistical test for detecting adversarial examples. In Kamalika Chaudhuri and Ruslan Salakhutdinov (eds.), *Proceedings of the 36th International Conference on Machine Learning, ICML 2019, 9-15 June 2019, Long Beach, California, USA*, volume 97 of *Proceedings of Machine Learning Research*, pp. 5498–5507. PMLR, 2019.
